# Supplementary material for: Genes and signaling networks regulated during zebrafish optic vesicle morphogenesis
Source: PubMed Central journal article supplement (PMC4190348; doi:10.1186/1471-2164-15-825), 2014-09-30

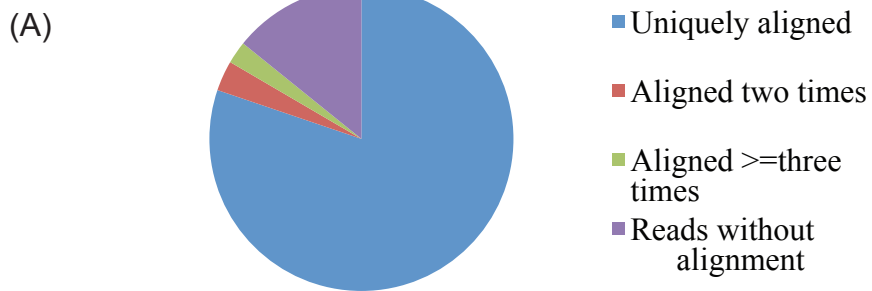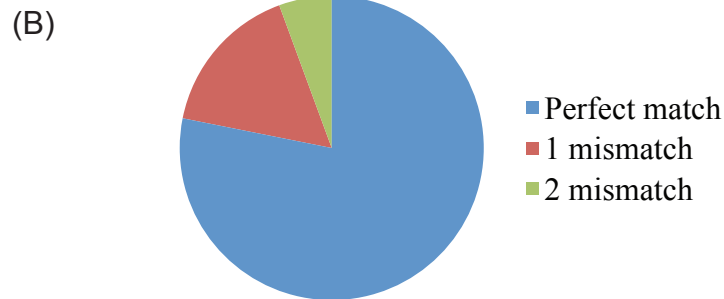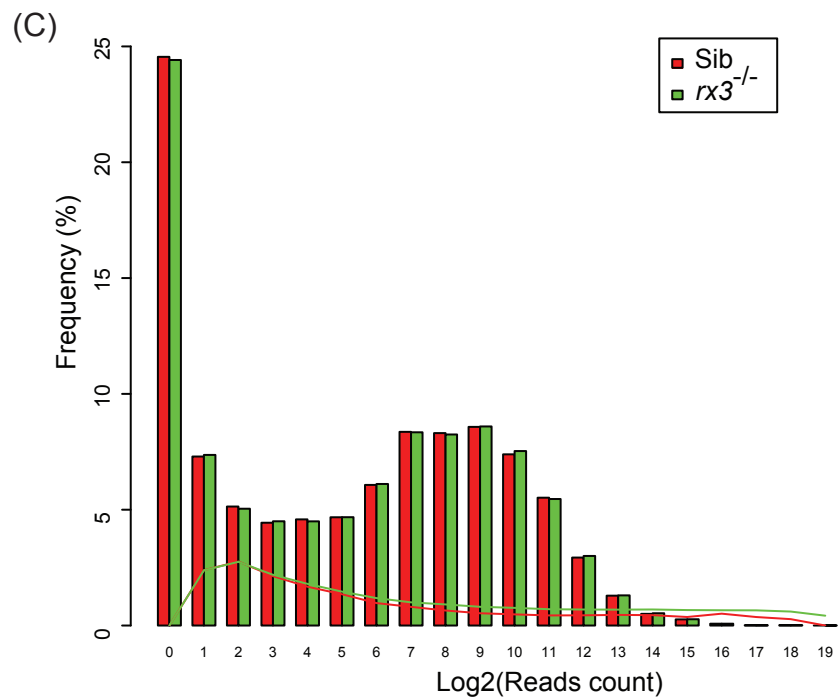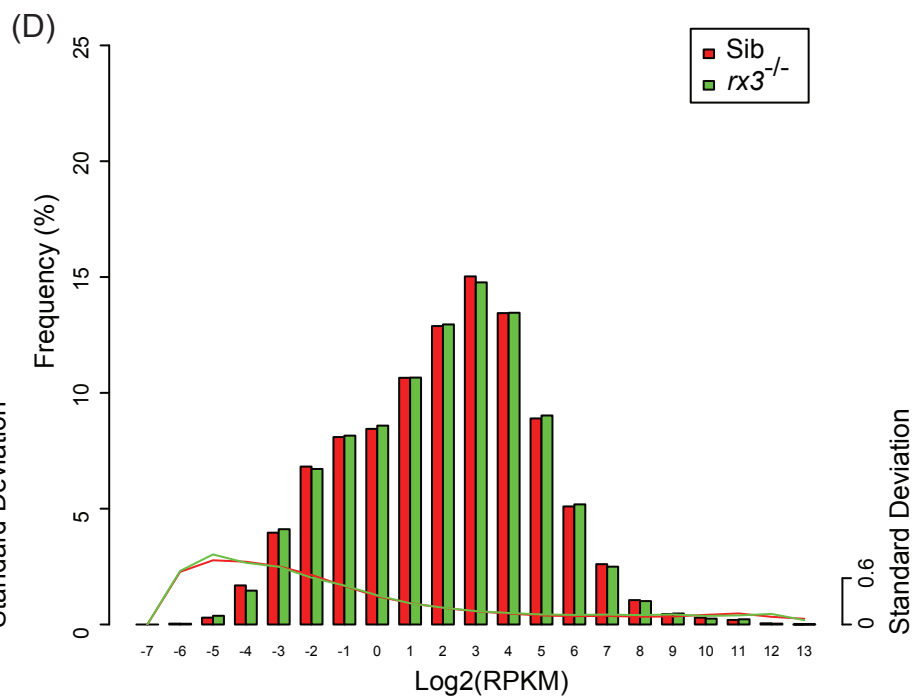

Supplement: 12864_2014_6503_MOESM1_ESM.pdf [file 12864_2014_6503_MOESM1_ESM.pdf]
